# Supplementary material for: The Engineering of a Novel Ligand in gH Confers to HSV an Expanded Tropism Independent of gD Activation by Its Receptors
Source: PubMed Central journal article supplement (PMC4440635; doi:10.1371/journal.ppat.1004907), 2015-05-21
Supplement: ppat.1004907.s001.pdf [file ppat.1004907.s001.pdf]

## SUPPORTING INFORMATION

S1 Fig.

|      |     |     |     |     |     |     |      |     |     |     |     |     |     |     |     |     |     |     |     |     |      |
|------|-----|-----|-----|-----|-----|-----|------|-----|-----|-----|-----|-----|-----|-----|-----|-----|-----|-----|-----|-----|------|
| 1    | Met | Gly | Asn | Gly | Leu | Trp | Phe  | Val | Gly | Val | Ile | Ile | Leu | Gly | Val | Ala | Trp | Gly | Gln | Val | 20   |
| 21   | His | Asp | Trp | His | Ser | Ser | Gly  | Gly | Gly | Ser | Gly | Ser | Asp | Ile | Gln | Met | Thr | Gln | Ser | Pro | 40   |
| 41   | Ser | Ser | Leu | Ser | Ala | Ser | Val  | Gly | Asp | Arg | Val | Thr | Ile | Thr | Cys | Arg | Ala | Ser | Gln | Asp | 60   |
| 61   | Val | Asn | Thr | Ala | Val | Ala | Trp  | Tyr | Gln | Gln | Lys | Pro | Gly | Lys | Ala | Pro | Lys | Leu | Leu | Ile | 80   |
| 81   | Tyr | Ser | Ala | Ser | Phe | Leu | Tyr  | Ser | Gly | Val | Pro | Ser | Arg | Phe | Ser | Gly | Ser | Arg | Ser | Gly | 100  |
| 101  | Thr | Asp | Phe | Thr | Leu | Thr | Ile  | Ser | Ser | Leu | Gln | Pro | Glu | Asp | Phe | Ala | Thr | Tyr | Tyr | Cys | 120  |
| 121  | Gln | Gln | His | Tyr | Thr | Thr | Pro  | Pro | Thr | Phe | Gly | Gln | Gly | Thr | Lys | Val | Glu | Ile | Lys | Ser | 140  |
| 141  | Asp | Met | Pro | Met | Ala | Asp | Pro  | Asn | Arg | Phe | Arg | Gly | Lys | Asn | Leu | Val | Phe | His | Ser | Glu | 160  |
| 161  | Val | Gln | Leu | Val | Glu | Ser | Gly  | Gly | Gly | Leu | Val | Gln | Pro | Gly | Gly | Ser | Leu | Arg | Leu | Ser | 180  |
| 181  | Cys | Ala | Ala | Ser | Gly | Phe | Asn  | Ile | Lys | Asp | Thr | Tyr | Ile | His | Trp | Val | Arg | Gln | Ala | Pro | 200  |
| 201  | Gly | Lys | Gly | Leu | Glu | Trp | Val  | Ala | Arg | Ile | Tyr | Pro | Thr | Asn | Gly | Tyr | Thr | Arg | Tyr | Ala | 220  |
| 221  | Asp | Ser | Val | Lys | Gly | Arg | Phe  | Thr | Ile | Ser | Ala | Asp | Thr | Ser | Lys | Asn | Thr | Ala | Tyr | Leu | 240  |
| 241  | Gln | Met | Asn | Ser | Leu | Arg | Ala  | Glu | Asp | Thr | Ala | Val | Tyr | Tyr | Cys | Ser | Arg | Trp | Gly | Gly | 260  |
| 261  | Asp | Gly | Phe | Tyr | Ala | Met | Asp  | Tyr | Trp | Gly | Gln | Gly | Thr | Leu | Val | Thr | Val | Ser | Ser | Ser | 280  |
| 281  | Gly | Gly | Gly | Ser | Gly | Ser | Gly  | Gly | Ser | Gly | Thr | Glu | Gln | Thr | Asp | Pro | Trp | Phe | Leu | Asp | 300  |
| 301  | Gly | Leu | Gly | Met | Asp | Arg | Met  | Tyr | Trp | Arg | Asp | Thr | Asn | Thr | Gly | Arg | Leu | Trp | Leu | Pro | 320  |
| 321  | Asn | Thr | Pro | Asp | Pro | Gln | Lys  | Pro | Pro | Arg | Gly | Phe | Leu | Ala | Pro | Pro | Asp | Glu | Leu | Asn | 340  |
| 341  | Leu | Thr | Thr | Ala | Ser | Leu | Pro  | Leu | Leu | Arg | Trp | Tyr | Glu | Glu | Arg | Phe | Cys | Phe | Val | Leu | 360  |
| 361  | Val | Thr | Thr | Ala | Glu | Phe | Pro  | Arg | Asp | Pro | Gly | Gln | Leu | Leu | Tyr | Ile | Pro | Lys | Thr | Tyr | 380  |
| 381  | Leu | Leu | Gly | Arg | Pro | Pro | Asn  | Ala | Ser | Leu | Pro | Ala | Pro | Thr | Thr | Val | Glu | Pro | Thr | Ala | 400  |
| 401  | Gln | Pro | Pro | Pro | Ser | Val | Ala  | Pro | Leu | Lys | Gly | Leu | Leu | Tyr | Asn | Pro | Val | Ala | Ser | Val | 420  |
| 421  | Leu | Leu | Arg | Ser | Arg | Ala | Trp  | Val | Thr | Phe | Ser | Ala | Val | Pro | Asp | Pro | Glu | Ala | Leu | Thr | 440  |
| 441  | Phe | Pro | Arg | Gly | Asp | Asn | Val  | Ala | Thr | Ala | Ser | His | Pro | Ser | Gly | Pro | Arg | Asp | Thr | Pro | 460  |
| 461  | Pro | Pro | Arg | Pro | Pro | Val | Gly  | Ala | Arg | Arg | His | Pro | Thr | Thr | Glu | Leu | Asp | Ile | Thr | His | 480  |
| 481  | Leu | His | Asn | Ala | Ser | Thr | Thr  | Trp | Leu | Ala | Thr | Arg | Gly | Leu | Leu | Arg | Ser | Pro | Gly | Arg | 500  |
| 501  | Tyr | Val | Tyr | Phe | Ser | Pro | Ser  | Ala | Ser | Thr | Trp | Pro | Val | Gly | Ile | Trp | Thr | Thr | Gly | Glu | 520  |
| 521  | Leu | Val | Leu | Gly | Cys | Asp | Ala  | Ala | Leu | Val | Arg | Ala | Arg | Tyr | Gly | Arg | Glu | Phe | Met | Gly | 540  |
| 541  | Leu | Val | Ile | Ser | Met | His | Asp  | Ser | Pro | Pro | Val | Glu | Val | Met | Val | Val | Pro | Ala | Gly | Gln | 560  |
| 561  | Thr | Leu | Asp | Arg | Val | Gly | Asp  | Pro | Ala | Asp | Glu | Asn | Pro | Pro | Gly | Ala | Leu | Pro | Gly | Pro | 580  |
| 581  | Pro | Gly | Gly | Pro | Arg | Tyr | Arg  | Val | Phe | Val | Leu | Gly | Ser | Leu | Thr | Arg | Ala | Asp | Asn | Gly | 600  |
| 601  | Ser | Ala | Leu | Asp | Ala | Leu | Arg  | Arg | Val | Gly | Gly | Tyr | Pro | Glu | Glu | Gly | Thr | Asn | Tyr | Ala | 620  |
| 621  | Gln | Phe | Leu | Ser | Arg | Ala | Tyr  | Ala | Glu | Phe | Phe | Ser | Gly | Asp | Ala | Gly | Ala | Glu | Gln | Gly | 640  |
| 641  | Pro | Arg | Pro | Pro | Leu | Phe | Trp  | Arg | Leu | Thr | Gly | Leu | Leu | Ala | Thr | Ser | Gly | Phe | Ala | Phe | 660  |
| 661  | Val | Asn | Ala | Ala | His | Ala | Asn  | Gly | Ala | Val | Cys | Leu | Ser | Asp | Leu | Leu | Gly | Phe | Leu | Ala | 680  |
| 681  | His | Ser | Arg | Ala | Leu | Ala | Gly  | Leu | Ala | Ala | Arg | Gly | Ala | Ala | Gly | Cys | Ala | Ala | Asp | Ser | 700  |
| 701  | Val | Phe | Phe | Asn | Val | Ser | Val  | Leu | Asp | Pro | Thr | Ala | Arg | Leu | Gln | Leu | Glu | Ala | Arg | Leu | 720  |
| 721  | Gln | His | Leu | Val | Ala | Glu | Ile  | Leu | Glu | Arg | Glu | Gln | Ser | Leu | Ala | Leu | His | Ala | Leu | Gly | 740  |
| 741  | Tyr | Gln | Leu | Ala | Phe | Val | Leu  | Asp | Ser | Pro | Ser | Ala | Tyr | Asp | Ala | Val | Ala | Pro | Ser | Ala | 760  |
| 761  | Ala | His | Leu | Ile | Asp | Ala | Leu  | Tyr | Ala | Glu | Phe | Leu | Gly | Gly | Arg | Val | Leu | Thr | Thr | Pro | 780  |
| 781  | Val | Val | His | Arg | Ala | Leu | Phe  | Tyr | Ala | Ser | Ala | Val | Leu | Arg | Gln | Pro | Phe | Leu | Ala | Gly | 800  |
| 801  | Val | Pro | Ser | Ala | Val | Gln | Arg  | Glu | Arg | Ala | Arg | Arg | Ser | Leu | Leu | Ile | Ala | Ser | Ala | Leu | 820  |
| 821  | Cys | Thr | Ser | Asp | Val | Ala | Ala  | Ala | Thr | Asn | Ala | Asp | Leu | Arg | Thr | Ala | Leu | Ala | Arg | Ala | 840  |
| 841  | Asp | His | Gln | Lys | Thr | Leu | Phe  | Trp | Leu | Pro | Asp | His | Phe | Ser | Pro | Cys | Ala | Ala | Ser | Leu | 860  |
| 861  | Arg | Phe | Asp | Leu | Asp | Glu | Ser  | Val | Phe | Ile | Leu | Asp | Ala | Leu | Ala | Gln | Ala | Thr | Arg | Ser | 880  |
| 881  | Glu | Thr | Pro | Val | Glu | Val | Leu  | Ala | Gln | Gln | Thr | His | Gly | Leu | Ala | Ser | Thr | Leu | Thr | Arg | 900  |
| 901  | Trp | Ala | His | Tyr | Asn | Ala | Leu  | Ile | Arg | Ala | Phe | Val | Pro | Glu | Ala | Ser | His | Arg | Cys | Gly | 920  |
| 921  | Gly | Gln | Ser | Ala | Asn | Val | Glu  | Pro | Arg | Ile | Leu | Val | Pro | Ile | Thr | His | Asn | Ala | Ser | Tyr | 940  |
| 941  | Val | Val | Thr | His | Ser | Pro | Leu  | Pro | Arg | Gly | Ile | Gly | Tyr | Lys | Leu | Thr | Gly | Val | Asp | Val | 960  |
| 961  | Arg | Arg | Pro | Leu | Phe | Leu | Thr  | Tyr | Leu | Thr | Ala | Thr | Cys | Glu | Gly | Ser | Thr | Arg | Asp | Ile | 980  |
| 981  | Glu | Ser | Lys | Arg | Leu | Val | Arg  | Thr | Gln | Asn | Gln | Arg | Asp | Leu | Gly | Leu | Val | Gly | Ala | Val | 1000 |
| 1001 | Phe | Met | Arg | Tyr | Thr | Pro | Ala  | Gly | Glu | Val | Met | Ser | Val | Leu | Leu | Val | Asp | Thr | Asp | Asn | 1020 |
| 1021 | Thr | Gln | Gln | Gln | Ile | Ala | Ala  | Gly | Pro | Thr | Glu | Gly | Ala | Pro | Ser | Val | Phe | Ser | Ser | Asp | 1040 |
| 1041 | Val | Pro | Ser | Thr | Ala | Leu | Leu  | Leu | Phe | Pro | Asn | Gly | Thr | Val | Ile | His | Leu | Leu | Ala | Phe | 1060 |
| 1061 | Asp | Thr | Gln | Pro | Val | Ala | Ala  | Ile | Ala | Pro | Gly | Phe | Leu | Ala | Ala | Ser | Ala | Leu | Gly | Val | 1080 |
| 1081 | Val | Met | Ile | Thr | Ala | Ala | Leu  | Ala | Gly | Ile | Leu | Lys | Val | Leu | Arg | Thr | Ser | Val | Pro | Phe | 1100 |
| 1101 | Phe | Trp | Arg | Arg | Glu | End | 1106 |     |     |     |     |     |     |     |     |     |     |     |     |     |      |

**Annotated sequence of gH-scFv chimera in R-VG803 and R-VG809.** Regions of interest are highlighted as follows. Signal sequence, yellow. scFv to HER2, blue. Upstream and downstream Ser-Gly linkers, green. scFv intermediate linker, red. Two residues implicated in MAb 52S epitope, S536 and A537 in wt-gH, fuchsia.
